# Supplementary material for: Genome mining of the citrus pathogen Elsinoë fawcettii; prediction and prioritisation of candidate effectors, cell wall degrading enzymes and secondary metabolite gene clusters
Source: PLoS One. 2020 May 29;15(5):e0227396. doi: 10.1371/journal.pone.0227396 (PMC7259788; doi:10.1371/journal.pone.0227396)
Supplement: S2 Table — (XLSX) [file pone.0227396.s002.xlsx]

## Sheet: Sheet1
Species	Total # of predicted genes (not including genes which overlap a TE region)	Genes with at least one Pfam hit		Core genes (found among all 11 species)		Other genes (found in at least 2 of the 11 species, but not all)		Unique genes (found in only in 1 of the 11 species)		Unique genes not assigned an orthoMCL group ID		Predicted CAZymes		Predicted CAZymes, also predicted as secreted
		Number	% of total proteins	Number	% of total proteins	Number	% of total proteins	Number	% of total proteins	Number	% of total proteins	Number	% of total proteins	Number	% of predicted CAZymes
Necrotrophic:
Elsinoë fawcettii	10080	7069	70.1	3077	30.5	4874	48.4	2129	21.1	1989	19.7	378	0.0375	203	0.537037
Botrytis cinerea	11481	7603	66.2	3191	27.8	6828	59.5	1462	12.7	1361	11.9	454	0.0395436	241	0.530837
Parastagonospora nodorum	15878	8101	51	3340	21	7285	45.9	5253	33.1	5130	32.3	448	0.0282151	220	0.491071
Pyrenophora tritici-repentis	10772	7103	65.9	3147	29.2	6049	56.2	1576	14.6	1489	13.8	405	0.0375975	212	0.523457
Sclerotinia sclerotiorum	13770	6696	48.6	3080	22.4	5976	43.4	4714	34.2	4647	33.7	387	0.0281046	184	0.475452
Zymoseptoria tritici	11936	7392	61.9	3165	26.5	5050	42.3	3721	31.2	3583	30	348	0.0291555	161	0.462644
Hemibiotrophic:
Leptosphaeria maculans	12337	6591	53.4	3110	25.2	5425	44	3802	30.8	3746	30.4	414	0.0335576	212	0.512077
Magnaporthe oryzae	12236	7258	59.3	3094	25.3	5306	43.4	3836	31.4	3617	29.6	487	0.0398006	271	0.556468
Rhynchosporium commune	12100	7511	62.1	3178	26.3	5804	48	3118	25.8	2986	24.7	401	0.0331405	209	0.521197
Verticillium dahliae	10441	7326	70.2	3129	30	5225	50	2087	20	1850	17.7	448	0.0429078	237	0.529018
Biotrophic:
Ustilago maydis	6692	5011	74.9	2834	42.4	1353	20.2	2505	37.4	1974	29.5	201	0.0300359	70	0.348259
